# Supplementary material for: Fatty Acids in the Eggs of Red King Crabs from the Barents Sea
Source: MDPI journal article supplement (doi:10.3390/ani14020348), 2024-01-22
Supplement: s1 [file s1]

**Table S1.** Fatty acid composition ( $\mu\text{g g}^{-1}$ ) of red king crab eggs in crabs with different numbers of injured legs (0, 1, and > 1) in Dalnezelenetskaya Bay, July 2016.

| Fatty acid | 0     |      |       |       | 1     |      |       |       | > 1   |      |       |       |
|------------|-------|------|-------|-------|-------|------|-------|-------|-------|------|-------|-------|
|            | X     | SE   | Min   | Max   | X     | SE   | Min   | Max   | X     | SE   | Min   | Max   |
| C6:0       | 2.1   | 0.3  | 1.1   | 4.2   | 1.8   | 0.1  | 1.5   | 2.6   | 2.2   | 0.3  | 1.3   | 3.3   |
| C8:0       | 3.3   | 0.2  | 1.9   | 5.3   | 3.6   | 0.3  | 2.6   | 5.6   | 4.6   | 0.2  | 4.0   | 5.1   |
| C9:0       | 3.2   | 0.2  | 1.7   | 5.6   | 3.4   | 0.5  | 1.9   | 6.7   | 4.7   | 0.4  | 2.9   | 5.8   |
| C10:0      | 6.8   | 0.3  | 4.5   | 8.9   | 7.7   | 0.7  | 5.4   | 11.0  | 8.2   | 0.7  | 6.1   | 10.5  |
| C11:0      | 4.2   | 0.4  | 1.5   | 9.1   | 3.0   | 0.3  | 1.8   | 4.5   | 4.8   | 1.1  | 1.6   | 8.0   |
| C12:0      | 143.6 | 7.8  | 83.6  | 234.3 | 159.0 | 9.0  | 101.8 | 207.4 | 132.4 | 9.6  | 101.7 | 164.0 |
| C13:0      | 20.5  | 1.1  | 9.3   | 31.3  | 23.7  | 0.8  | 19.9  | 26.4  | 17.5  | 1.6  | 13.2  | 22.7  |
| C14:0      | 903   | 45   | 480   | 1335  | 998   | 34   | 818   | 1112  | 770   | 76   | 534   | 1007  |
| C15:0      | 453.9 | 20.7 | 278.0 | 686.9 | 534.2 | 13.5 | 466.3 | 601.8 | 449.5 | 20.2 | 391.3 | 521.3 |
| C16:0      | 7601  | 302  | 5453  | 10787 | 8783  | 490  | 7194  | 12450 | 8006  | 356  | 6961  | 9595  |
| C17:0      | 337.1 | 13.7 | 242.4 | 478.0 | 402.1 | 11.1 | 360.1 | 459.8 | 357.7 | 8.4  | 333.3 | 388.1 |
| C18:0      | 2451  | 104  | 1572  | 3216  | 2686  | 138  | 2106  | 3468  | 2365  | 86   | 2110  | 2668  |
| C20:0      | 139.1 | 9.5  | 51.0  | 198.9 | 138.8 | 7.7  | 99.4  | 166.7 | 102.5 | 8.8  | 87.2  | 136.0 |
| C21:0      | 33.7  | 4.9  | 7.1   | 73.0  | 40.6  | 8.6  | 10.7  | 74.8  | 26.0  | 9.3  | 10.7  | 70.7  |
| C22:0      | 28.8  | 3.0  | 5.8   | 59.5  | 29.8  | 4.3  | 15.0  | 53.8  | 24.2  | 4.1  | 12.0  | 36.7  |
| C23:0      | 109.3 | 19.2 | 42.6  | 447.5 | 124.9 | 15.9 | 81.7  | 251.7 | 114.3 | 11.9 | 72.8  | 157.0 |
| C24:0      | 255.8 | 33.8 | 91.1  | 696.6 | 349.5 | 48.9 | 145.2 | 625.8 | 227.5 | 42.3 | 116.0 | 380.7 |
| C14:1t     | 15.2  | 0.0  | 15.2  | 15.2  | –     | –    | –     | –     | 4.1   | 0.0  | 4.1   | 4.1   |
| C14:1C     | 12.0  | 1.2  | 5.1   | 28.0  | 11.0  | 1.0  | 3.2   | 13.9  | 9.8   | 1.7  | 6.0   | 17.0  |
| C15:1      | 5.6   | 1.3  | 0.8   | 13.5  | 2.6   | 1.4  | 0.9   | 5.4   | 3.9   | 0.8  | 3.1   | 4.7   |
| C16:1t     | 92.2  | 4.4  | 63.3  | 138.5 | 106.1 | 3.5  | 78.1  | 115.5 | 97.3  | 16.5 | 21.7  | 132.6 |
| C16:1C     | 3595  | 181  | 2113  | 5350  | 3996  | 253  | 2844  | 5142  | 3559  | 234  | 2973  | 4391  |
| C17:1      | 6.8   | 0.7  | 3.2   | 12.3  | 7.4   | 1.3  | 2.9   | 14.6  | 4.3   | 0.4  | 3.1   | 4.8   |
| C18:1n9t   | 274.4 | 10.5 | 190.5 | 356.4 | 316.8 | 21.2 | 205.5 | 412.6 | 251.9 | 23.5 | 138.1 | 296.0 |
| C18:1n9C   | 6543  | 309  | 4266  | 9599  | 7598  | 538  | 5506  | 11360 | 7068  | 482  | 6017  | 9155  |
| C20:1      | 1084  | 65   | 562   | 1897  | 1220  | 83   | 890   | 1816  | 1033  | 115  | 767   | 1392  |
| C22:1      | 119.6 | 9.9  | 59.1  | 204.7 | 105.4 | 5.1  | 86.8  | 144.3 | 92.6  | 5.3  | 74.8  | 108.3 |
| C24:1      | 49.6  | 3.7  | 24.9  | 87.0  | 51.4  | 3.4  | 36.2  | 63.8  | 44.9  | 7.2  | 25.8  | 74.0  |
| C18:2n6t   | 115.2 | 27.6 | 9.9   | 411.7 | 161.3 | 42.1 | 31.2  | 423.5 | 209.1 | 67.4 | 44.1  | 365.8 |
| C18:2n6C   | 629   | 36   | 336   | 995   | 708   | 30   | 603   | 917   | 580   | 49   | 467   | 785   |
| C18:3n3    | 338.8 | 26.3 | 152.2 | 604.6 | 371.3 | 38.1 | 231.5 | 586.9 | 286.1 | 38.6 | 215.1 | 465.5 |
| C18:3n6    | 188.8 | 14.1 | 98.3  | 340.8 | 230.2 | 23.1 | 134.1 | 332.0 | 161.8 | 21.1 | 86.2  | 244.0 |
| C20:2      | 625   | 31   | 364   | 913   | 656   | 28   | 516   | 814   | 521   | 31   | 423   | 650   |
| C20:3n6    | 106.6 | 8.4  | 56.2  | 215.5 | 104.6 | 6.4  | 69.7  | 128.8 | 89.7  | 3.3  | 82.7  | 100.5 |
| C20:4n6    | 2626  | 165  | 1183  | 4251  | 2985  | 111  | 2523  | 3594  | 2285  | 231  | 1672  | 3032  |
| C22:2      | 6.0   | 0.9  | 1.6   | 15.1  | 6.4   | 1.0  | 2.8   | 13.2  | 9.7   | 3.1  | 0.9   | 22.6  |
| C20:5n3    | 13299 | 692  | 7530  | 18244 | 14561 | 823  | 11354 | 18394 | 11934 | 897  | 10126 | 15234 |
| C22:6n3    | 7557  | 426  | 5007  | 12040 | 9241  | 486  | 7107  | 12037 | 8498  | 784  | 7049  | 12065 |
| C20:3n3    | 189.5 | 17.7 | 60.3  | 404.2 | 187.4 | 10.2 | 146.7 | 242.8 | 129.0 | 14.6 | 97.7  | 195.3 |
| C22:4n6    | 196.6 | 13.5 | 136.1 | 415.0 | 208.3 | 15.0 | 135.5 | 285.8 | 201.5 | 19.8 | 146.9 | 291.8 |
| C22:3n3    | 5.2   | 1.1  | 1.0   | 15.4  | 7.0   | 1.7  | 0.9   | 15.7  | 3.6   | 1.9  | 1.0   | 10.9  |
| C22:5n6    | 128.3 | 6.3  | 83.0  | 185.3 | 166.0 | 9.2  | 136.8 | 215.0 | 135.6 | 10.3 | 101.5 | 168.7 |
| C22:5n3    | 804   | 33   | 566   | 1237  | 882   | 61   | 646   | 1216  | 924   | 99   | 568   | 1162  |
| ΣSFA       | 12639 | 518  | 8369  | 17368 | 14290 | 662  | 11860 | 18916 | 12617 | 501  | 11296 | 14614 |
| ΣMUFA      | 11774 | 550  | 7304  | 17069 | 13412 | 810  | 9799  | 18425 | 12162 | 751  | 10296 | 15404 |
| ΣPUFA      | 26815 | 1288 | 15831 | 37113 | 30475 | 1365 | 25094 | 37468 | 25929 | 1671 | 22647 | 33235 |
| Total      | 51085 | 2325 | 31504 | 70464 | 58177 | 2738 | 46754 | 74809 | 50712 | 2786 | 44723 | 63253 |

Note. X – mean, SE – standard error, Min – minimum, Max – maximum, SFA – saturated fatty acids, MUFA – monounsaturated fatty acids, PUFA – polyunsaturated fatty acids.

**Table S2.** Fatty acid composition ( $\mu\text{g g}^{-1}$ ) of red king crab eggs in crabs from hard and soft-bottom habitats in Dalnezelenetskaya Bay, July 2016.

| Fatty acid | Hard bottom |       |        |        | Soft bottom |       |        |        |
|------------|-------------|-------|--------|--------|-------------|-------|--------|--------|
|            | X           | SE    | Min    | Max    | X           | SE    | Min    | Max    |
| C6:0       | 2.0         | 0.2   | 1.1    | 4.2    | 2.1         | 0.4   | 1.4    | 3.8    |
| C8:0       | 3.7         | 0.2   | 1.9    | 5.6    | 3.1         | 0.3   | 2.1    | 4.5    |
| C9:0       | 3.4         | 0.2   | 1.7    | 6.7    | 3.9         | 0.5   | 1.7    | 5.8    |
| C10:0      | 7.4         | 0.4   | 4.5    | 11.0   | 6.7         | 0.4   | 4.8    | 7.7    |
| C11:0      | 4.0         | 0.3   | 1.5    | 9.1    | 4.0         | 0.7   | 1.8    | 6.8    |
| C12:0      | 149.5       | 6.6   | 83.6   | 234.3  | 133.0       | 5.9   | 109.6  | 160.6  |
| C13:0      | 21.4        | 0.9   | 9.3    | 31.3   | 18.8        | 1.4   | 13.2   | 22.6   |
| C14:0      | 911.1       | 38.1  | 480.2  | 1334.7 | 893.3       | 50.2  | 676.7  | 1023.6 |
| C15:0      | 485.2       | 16.9  | 278.0  | 686.9  | 437.8       | 15.1  | 391.3  | 529.5  |
| C16:0      | 8070        | 283   | 5453   | 12450  | 7683        | 359   | 6835   | 10055  |
| C17:0      | 364.0       | 11.7  | 242.4  | 478.0  | 336.1       | 8.6   | 313.3  | 392.5  |
| C18:0      | 2506        | 89    | 1572   | 3468   | 2481        | 101   | 2215   | 3069   |
| C20:0      | 129.8       | 7.1   | 51.0   | 198.9  | 144.9       | 13.0  | 87.2   | 176.2  |
| C21:0      | 35.7        | 4.3   | 7.1    | 74.8   | 29.2        | 9.4   | 10.7   | 73.9   |
| C22:0      | 26.9        | 2.4   | 5.8    | 59.5   | 33.7        | 4.1   | 18.2   | 44.5   |
| C23:0      | 114.5       | 14.3  | 42.6   | 447.5  | 113.7       | 18.3  | 53.1   | 189.5  |
| C24:0      | 296.7       | 29.6  | 91.1   | 696.6  | 203.6       | 32.5  | 116.0  | 343.4  |
| C14:1t     | 9.6         | 5.5   | 4.1    | 15.2   | –           | –     | –      | –      |
| C14:1C     | 11.6        | 0.9   | 3.2    | 28.0   | 10.6        | 1.2   | 6.0    | 15.1   |
| C15:1      | 5.2         | 1.2   | 0.8    | 13.5   | 3.4         | 0.1   | 3.1    | 3.6    |
| C16:1t     | 97.6        | 4.8   | 21.7   | 138.5  | 94.5        | 2.9   | 81.5   | 104.3  |
| C16:1C     | 3721        | 155   | 2113   | 5350   | 3611        | 226   | 2973   | 4997   |
| C17:1      | 6.3         | 0.6   | 2.9    | 14.6   | 8.1         | 1.4   | 4.7    | 12.3   |
| C18:1n9t   | 278.2       | 11.6  | 138.1  | 412.6  | 296.7       | 13.5  | 269.9  | 360.2  |
| C18:1n9C   | 6989        | 297   | 4266   | 11360  | 6638        | 386   | 6017   | 9313   |
| C20:1      | 1133        | 57    | 562    | 1897   | 1036        | 68    | 784    | 1284   |
| C22:1      | 106.0       | 6.0   | 59.1   | 200.3  | 131.1       | 16.5  | 77.1   | 204.7  |
| C24:1      | 49.6        | 3.1   | 24.9   | 87.0   | 48.4        | 3.4   | 33.8   | 57.6   |
| C18:2n6t   | 134.0       | 22.3  | 12.7   | 411.7  | 165.9       | 63.9  | 9.9    | 423.5  |
| C18:2n6C   | 661.6       | 28.7  | 336.3  | 995.3  | 572.4       | 32.3  | 467.4  | 720.8  |
| C18:3n3    | 352.2       | 23.4  | 152.2  | 604.6  | 291.3       | 20.5  | 215.1  | 352.5  |
| C18:3n6    | 196.7       | 14.0  | 86.2   | 340.8  | 191.7       | 9.2   | 169.1  | 227.5  |
| C20:2      | 607.6       | 24.9  | 363.5  | 913.0  | 649.8       | 36.4  | 513.0  | 813.7  |
| C20:3n6    | 101.7       | 6.3   | 56.2   | 215.5  | 109.1       | 7.0   | 82.7   | 132.6  |
| C20:4n6    | 2687.5      | 127.6 | 1183.1 | 4250.5 | 2596.0      | 223.7 | 1671.6 | 3348.8 |
| C22:2      | 7.2         | 0.9   | 0.9    | 22.6   | 5.0         | 1.5   | 1.6    | 13.2   |
| C20:5n3    | 13433       | 591   | 7530   | 18394  | 13366       | 719   | 10566  | 16898  |
| C22:6n3    | 8419        | 366   | 5007   | 12065  | 7245        | 570   | 5715   | 10710  |
| C20:3n3    | 179.7       | 13.1  | 60.3   | 404.2  | 177.2       | 21.2  | 97.7   | 239.1  |
| C22:4n6    | 202.8       | 10.8  | 135.5  | 415.0  | 192.6       | 15.2  | 155.4  | 285.8  |
| C22:3n3    | 6.2         | 1.0   | 0.9    | 15.7   | 3.2         | 1.5   | 1.0    | 12.9   |
| C22:5n6    | 141.8       | 6.5   | 83.0   | 215.0  | 131.9       | 6.1   | 117.5  | 168.3  |
| C22:5n3    | 825         | 32    | 566    | 1237   | 916         | 75    | 696    | 1192   |
| ΣSFA       | 13131       | 449   | 8369   | 18916  | 12903       | 534   | 11719  | 15986  |
| ΣMUFA      | 12392       | 491   | 7304   | 18425  | 11874       | 657   | 10296  | 16218  |
| ΣPUFA      | 27950       | 1081  | 15831  | 37468  | 26609       | 1338  | 22647  | 34989  |
| Total      | 53473       | 1977  | 31504  | 74809  | 51014       | 2471  | 44723  | 67193  |

Note. X – mean, SE – standard error, Min – minimum, Max – maximum, SFA – saturated fatty acids, MUFA – monounsaturated fatty acids, PUFA – polyunsaturated fatty acids.

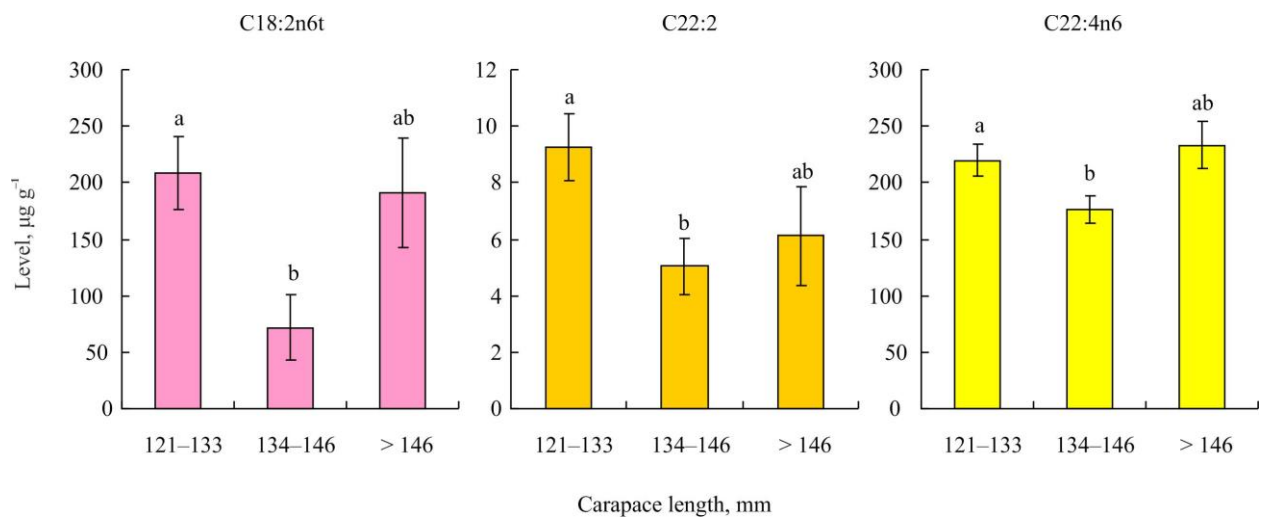

**Figure S1.** Significant variation in the content of fatty acids in the eggs of female red king crabs of different sizes from the Dalnezelenetskaya Bay, July 2016. Vertical bars show standard errors. Different letters show significant differences between groups.

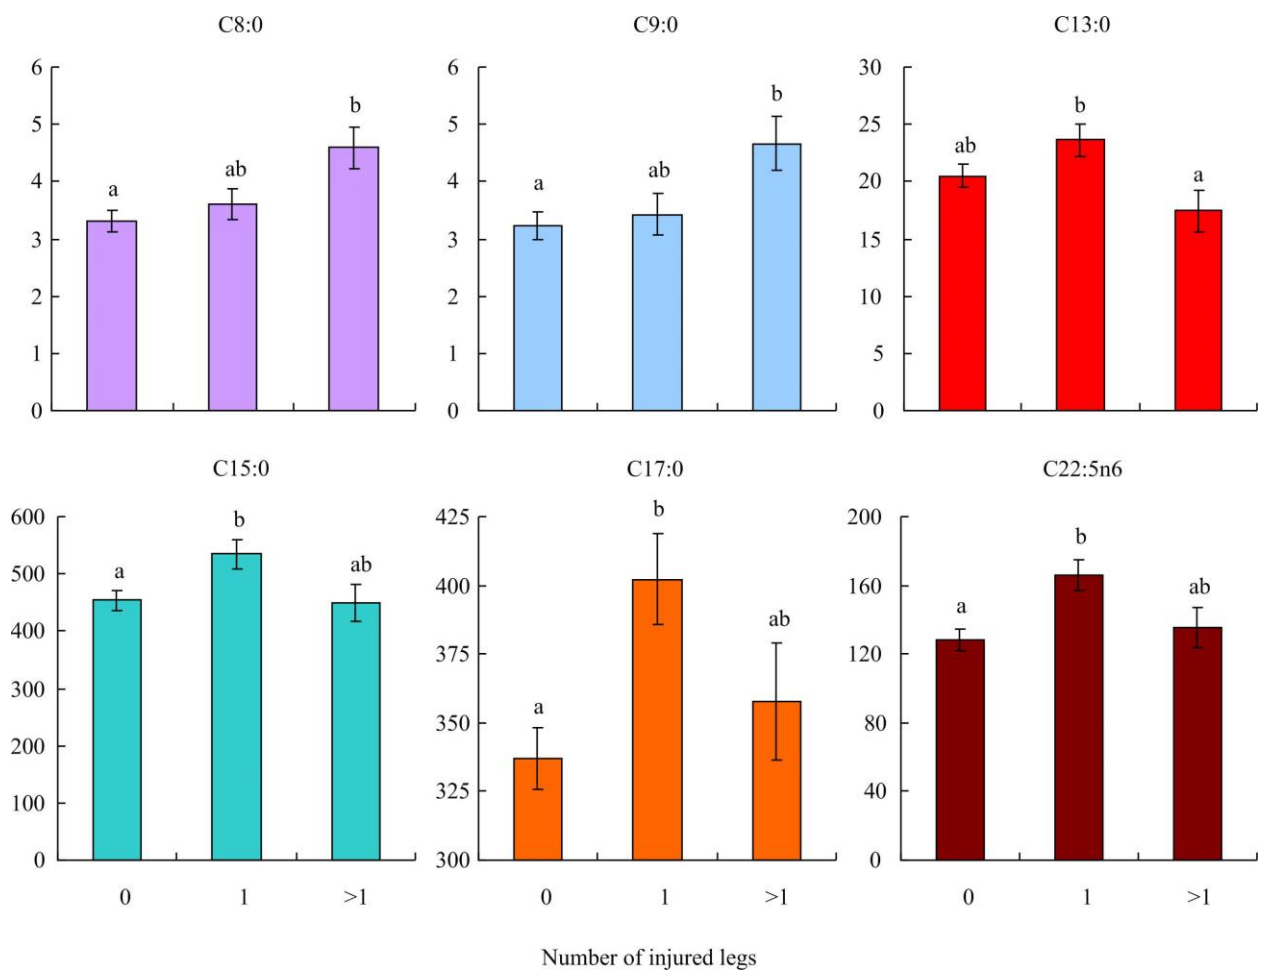

**Figure S2.** Significant variations in fatty acid content in eggs of female red king crabs with different numbers of injured legs in Dalnezelenetskaya Bay, July 2016. Vertical bars show standard errors. Different letters show significant differences between groups.
